# Supplementary material for: Pyridine-based electron transporting materials for highly efficient organic solar cells
Source: Royal Society of Chemistry journal article supplement (doi:10.1039/c2ta00253a), 2012-11-26
Supplement: c2ta00253a.pdf [file c2ta00253a.pdf]

## Supporting Information

### **Pyridine-based Electron Transporting Materials for Highly Efficient Organic Solar Cells**

**Hao-Wu Lin<sup>a,\*</sup>, Chih-Wei Lu<sup>a</sup>, Li-Yen Lin<sup>b</sup>, Yi-Hong Chen<sup>a</sup>, Wei-Chieh Lin<sup>a</sup>,  
Ken-Tsung Wong<sup>b</sup>, Francis Lin<sup>b</sup>**

<sup>a</sup> Department of Materials Science and Engineering, National Tsing Hua University, No. 101, Section 2, Kuang-Fu Road, Hsinchu, Taiwan 30013. E-mail: [hwlin@mx.nthu.edu.tw](mailto:hwlin@mx.nthu.edu.tw)

<sup>b</sup> Department of Chemistry, National Taiwan University, No.1, Section 4, Roosevelt Road, Taipei, Taiwan 10617.

#### **1. Effect of electron transporting layer thickness**

Fig. S1 shows the spectral mismatch corrected *J-V* characteristics of different BCP and TmPyPB thicknesses in the optimized device structure and the device performances are listed in Table S1.

**Table S1** Performance parameters of the devices.

| Device type            | ETL (thickness) | $J_{sc}$ (mA/cm <sup>2</sup> ) | $V_{oc}$ (V) | FF          | PCE (%)     |
|------------------------|-----------------|--------------------------------|--------------|-------------|-------------|
|                        | BCP (10 nm)     | 14.91 ± 0.17                   | 0.78 ± 0.01  | 0.47 ± 0.01 | 5.6 ± 0.1   |
|                        | BCP (12 nm)     | 12.35 ± 0.16                   | 0.81 ± 0.01  | 0.42 ± 0.01 | 4.3 ± 0.1   |
| DTDCTB:C <sub>70</sub> | BCP (20 nm)     | 5.15 ± 0.05                    | 0.81 ± 0.01  | 0.18 ± 0.01 | 0.81 ± 0.01 |
| (1:1.6)                | TmPyPB (10 nm)  | 14.61 ± 0.36                   | 0.79 ± 0.01  | 0.52 ± 0.01 | 6.1 ± 0.2   |
|                        | TmPyPB (12 nm)  | 12.56 ± 0.32                   | 0.81 ± 0.01  | 0.52 ± 0.01 | 5.4 ± 0.1   |
|                        | TmPyPB (20 nm)  | 1.31 ± 0.20                    | 0.79 ± 0.01  | 0.21 ± 0.01 | 0.23 ± 0.04 |

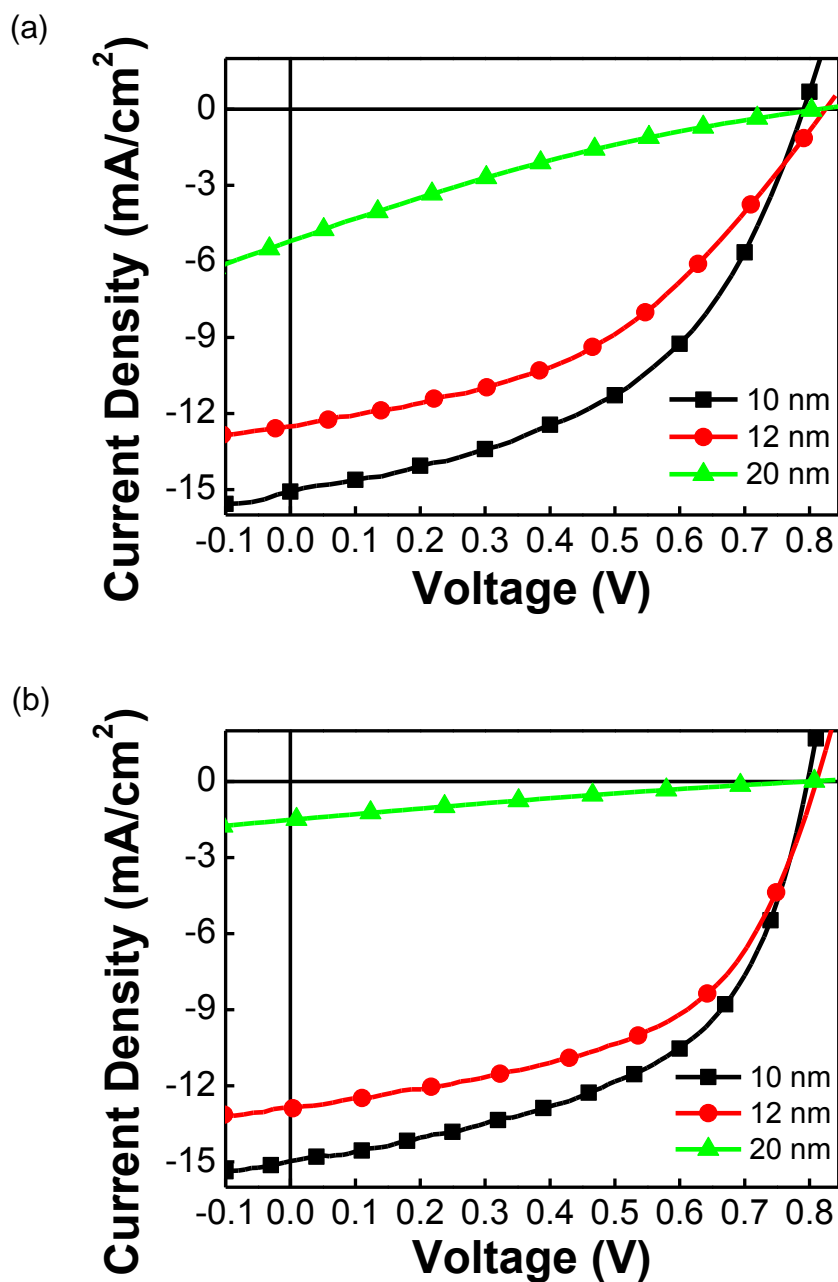

**Fig. S1** (a) Mismatch corrected  $J$ - $V$  characteristics (under 1 sun, AM 1.5G illumination) of the devices with the following structures: ITO/MoO<sub>3</sub> (5 nm)/DTDCTB (7 nm)/DTDCTB:C70 (1:1.6 by volume, 40 nm)/C70 (7 nm)/BCP (10, 12, 20 nm)/Ag (150 nm). (b) Mismatch corrected  $J$ - $V$  characteristics (under 1 sun, AM 1.5G illumination) of the devices with the following structures: ITO/MoO<sub>3</sub> (5 nm)/DTDCTB (7 nm)/DTDCTB:C70 (1:1.6 by volume, 40 nm)/C70 (7 nm)/TmPyPB (10, 12, 20 nm)/Ag (150 nm).
